# Supplementary material
Source: PubMed Central journal article supplement (PMC9382400)
Supplement: ocac101_supplementary_data.pdf [file ocac101_supplementary_data.pdf]

# Networking, Mentoring, and Lifecycle Survey 2020

Thank you for participating in this survey. The purpose of the survey is (1) to identify resources/needs to help support women in informatics and to connect them to the appropriate resources; (2) to further the opportunity and attract more women into the informatics field based on meeting appropriate resources; (3) to learn the impact of COVID-19 on women in informatics.

The survey has 16 questions and would take less than five minutes to complete. Your suggestions and comments are greatly appreciated!

1. What type of career in informatics are you involved in at the present time?

*Mark only one oval.*

- Academic or research institution
- Clinical practice
- Informatics-related Industry
- Government or regulatory organization
- Other (please specify)

2. Pick from the list below what career lifecycle you identify with at your current work settings:

*Mark only one oval.*

- Full time student (including interns and residents)
- Early career: entry into workforce/ career establishment
- Mid-career: career advancement/stability
- Advanced-career: transition/encore careers/semi-retired
- Retired

## 3. What is your age range?

*Mark only one oval.*

- 21-30 years
- 31-40 years
- 41-50 years
- 51-60 years
- Over 60 years

## 4. What is your gender?

*Mark only one oval.*

- Male
- Female
- Transgender Female
- Transgender Male
- Gender Variant/Non-Conforming
- Not Listed
- Prefer Not to Answer

5. The next series of questions related to your needs and expectations as a member of AMIA. Please rate the issues below.

Mark only one oval per row.

|                                                                                                            | Not at all important  | A little important    | Neutral               | Somewhat important    | Very important        | Not applicable to me  |
|------------------------------------------------------------------------------------------------------------|-----------------------|-----------------------|-----------------------|-----------------------|-----------------------|-----------------------|
| Increase networking opportunities for women in AMIA                                                        | <input type="radio"/> | <input type="radio"/> | <input type="radio"/> | <input type="radio"/> | <input type="radio"/> | <input type="radio"/> |
| Improve the "family friendliness" of AMIA conferences (e.g., provide child care service at the conference) | <input type="radio"/> | <input type="radio"/> | <input type="radio"/> | <input type="radio"/> | <input type="radio"/> | <input type="radio"/> |
| Raise awareness of gender-specific challenges in career development                                        | <input type="radio"/> | <input type="radio"/> | <input type="radio"/> | <input type="radio"/> | <input type="radio"/> | <input type="radio"/> |
| Highlight gender in AMIA's workforce-related mission/vision/values statements                              | <input type="radio"/> | <input type="radio"/> | <input type="radio"/> | <input type="radio"/> | <input type="radio"/> | <input type="radio"/> |
| Encourage gender proportional representation in AMIA leadership                                            | <input type="radio"/> | <input type="radio"/> | <input type="radio"/> | <input type="radio"/> | <input type="radio"/> | <input type="radio"/> |

6. How do you rate the effectiveness of the following event/activities offered by the Women in AMIA subcommittees that improve the networking, mentoring, and lifecycle aspects of individuals:

Mark only one oval per row.

|                                                                                                                                                       | Least effective       | A little effective    | Neutral               | Somewhat effective    | Very effective        | Other                 |
|-------------------------------------------------------------------------------------------------------------------------------------------------------|-----------------------|-----------------------|-----------------------|-----------------------|-----------------------|-----------------------|
| Women in Informatics Networking Event (WINE)<br><a href="https://www.amia.org/amia2019/wine">https://www.amia.org/amia2019/wine</a>                   | <input type="radio"/> | <input type="radio"/> | <input type="radio"/> | <input type="radio"/> | <input type="radio"/> | <input type="radio"/> |
| Mentoring event<br><a href="https://www.amia.org/mentor-match-0">https://www.amia.org/mentor-match-0</a>                                              | <input type="radio"/> | <input type="radio"/> | <input type="radio"/> | <input type="radio"/> | <input type="radio"/> | <input type="radio"/> |
| Women in AMIA Podcast<br><a href="https://www.amia.org/amia-podcasts">https://www.amia.org/amia-podcasts</a>                                          | <input type="radio"/> | <input type="radio"/> | <input type="radio"/> | <input type="radio"/> | <input type="radio"/> | <input type="radio"/> |
| Women in AMIA Monthly Newsletter<br><a href="https://www.amia.org/women-amia-initiative">https://www.amia.org/women-amia-initiative</a>               | <input type="radio"/> | <input type="radio"/> | <input type="radio"/> | <input type="radio"/> | <input type="radio"/> | <input type="radio"/> |
| Women in AMIA "First Look" program<br><a href="https://www.amia.org/amia2020/first-look-program">https://www.amia.org/amia2020/first-look-program</a> | <input type="radio"/> | <input type="radio"/> | <input type="radio"/> | <input type="radio"/> | <input type="radio"/> | <input type="radio"/> |

7. Please specify other events that you found to be effective in AMIA:

---



---



---



---



---

8. How do you rate the effectiveness of the following action for AMIA as a community to raise awareness of gender-specific challenges in career development?

Mark only one oval per row.

|                                                                                    | Least effective       | A little effective    | Neutral               | Somewhat effective    | Very effective        | I have NOT attended that event (never heard of it) |
|------------------------------------------------------------------------------------|-----------------------|-----------------------|-----------------------|-----------------------|-----------------------|----------------------------------------------------|
| Panel discussion on gender-specific challenges in career development               | <input type="radio"/> | <input type="radio"/> | <input type="radio"/> | <input type="radio"/> | <input type="radio"/> | <input type="radio"/>                              |
| Workshop on gender-specific challenges in career development                       | <input type="radio"/> | <input type="radio"/> | <input type="radio"/> | <input type="radio"/> | <input type="radio"/> | <input type="radio"/>                              |
| Scientific sessions on gender-specific challenges in career development            | <input type="radio"/> | <input type="radio"/> | <input type="radio"/> | <input type="radio"/> | <input type="radio"/> | <input type="radio"/>                              |
| Social events in AMIA meetings on gender-specific challenges in career development | <input type="radio"/> | <input type="radio"/> | <input type="radio"/> | <input type="radio"/> | <input type="radio"/> | <input type="radio"/>                              |

9. Please specify other events that you found to be effective to raise awareness of gender-specific challenges in career development:

---



---



---



---



---

10. How do you rate the effectiveness of the following action for AMIA as a community to encourage gender proportional representation in AMIA leadership?

Mark only one oval per row.

|                                                                              | Least effective       | A little effective    | Neutral               | Somewhat effective    | Very effective        | Not applicable        |
|------------------------------------------------------------------------------|-----------------------|-----------------------|-----------------------|-----------------------|-----------------------|-----------------------|
| Nominating women for AMIA leadership                                         | <input type="radio"/> | <input type="radio"/> | <input type="radio"/> | <input type="radio"/> | <input type="radio"/> | <input type="radio"/> |
| Providing leadership training opportunities                                  | <input type="radio"/> | <input type="radio"/> | <input type="radio"/> | <input type="radio"/> | <input type="radio"/> | <input type="radio"/> |
| Sending email reminder to encourage women to nominate peers or self-nominate | <input type="radio"/> | <input type="radio"/> | <input type="radio"/> | <input type="radio"/> | <input type="radio"/> | <input type="radio"/> |

11. Please specify other events that you found to be effective for AMIA as a community to encourage gender proportional representation in AMIA leadership:

---



---



---



---



---

12. How do you rate the level of the impact of the following professional quality, accomplishment, or skill for a successful career in the informatics field?

*Mark only one oval per row.*

|                   | Least significant     | A little significant  | Neutral               | Somewhat significant  | Very significant      |
|-------------------|-----------------------|-----------------------|-----------------------|-----------------------|-----------------------|
| Communication     | <input type="radio"/> | <input type="radio"/> | <input type="radio"/> | <input type="radio"/> | <input type="radio"/> |
| Critical thinking | <input type="radio"/> | <input type="radio"/> | <input type="radio"/> | <input type="radio"/> | <input type="radio"/> |
| Analytical skills | <input type="radio"/> | <input type="radio"/> | <input type="radio"/> | <input type="radio"/> | <input type="radio"/> |
| Leadership skills | <input type="radio"/> | <input type="radio"/> | <input type="radio"/> | <input type="radio"/> | <input type="radio"/> |
| Social skills     | <input type="radio"/> | <input type="radio"/> | <input type="radio"/> | <input type="radio"/> | <input type="radio"/> |
| Others            | <input type="radio"/> | <input type="radio"/> | <input type="radio"/> | <input type="radio"/> | <input type="radio"/> |

13. List and rank three things in order of priority that AMIA could do to help improve your professional quality or skills to succeed in informatics.

---

14. How do you rate the level of the impact of the obstacles listed below for your career?

*Mark only one oval per row.*

|                     | Not significant at all | A little significant  | Neutral               | Somewhat significant  | Very significant      |
|---------------------|------------------------|-----------------------|-----------------------|-----------------------|-----------------------|
| Work-life-balance   | <input type="radio"/>  | <input type="radio"/> | <input type="radio"/> | <input type="radio"/> | <input type="radio"/> |
| Gender bias         | <input type="radio"/>  | <input type="radio"/> | <input type="radio"/> | <input type="radio"/> | <input type="radio"/> |
| Building connection | <input type="radio"/>  | <input type="radio"/> | <input type="radio"/> | <input type="radio"/> | <input type="radio"/> |

- 15. List and rank three things in order of priority that AMIA could do to help overcome obstacles.

---

---

---

---

---

- 16. If you would like to share your story with us about being a member in informatics, please provide your email in the text box below so we can contact you. Your email will be used for this purpose only.

---

---

---

---

---

### COVID-19 Related Questions

- 17. Was your work-life impacted by COVID-19?

*Check all that apply.*

- COVID-19 has not impacted my life.
- Yes. I am MORE satisfied with the amount of time I spend with my family.
- Yes. I am NOT satisfied with the amount of time I spend with my family.
- Yes. I am MORE satisfied with the amount of time I spend working.
- Yes. I am NOT satisfied with the amount of time I spend working.

Other:  \_\_\_\_\_



18. What are your biggest career and family life concerns/challenges during/aftermath of the COVID-19 pandemic?

---

---

---

---

---

19. What are your biggest networking and mentoring concerns/challenges during/aftermath of the COVID-19 pandemic?

---

---

---

---

---

20. How can AMIA or WIA help deal with the above-mentioned concerns during/aftermath of the COVID-19 pandemic?

---

---

---

---

---

---

This content is neither created nor endorsed by Google.

Google Forms
